# Supplementary material for: Factor analysis of the influence of environmental conditions on VOC emissions from medium density fibreboard and the correlation of the factors with fitting parameters
Source: Royal Society of Chemistry journal article supplement (doi:10.1039/d1ra02164h), 2021-01-01
Supplement: d1ra02164h1.pdf [file d1ra02164h1.pdf]

**Factor analysis of the influence of environmental conditions on  
VOCs emissions from medium density fibreboard and the  
correlation of the factors with fitting parameters**

Huiqi Shao,<sup>a</sup> Yifan Ren,<sup>a</sup> Yan Zhang,<sup>b</sup> Chuandong Wu,<sup>a</sup> Wenhui Li<sup>a</sup> and Jiemin Liu,<sup>\*a</sup>

<sup>a</sup> School of Chemistry and Biological Engineering, University of Science and  
Technology Beijing, Beijing 100083, China.

<sup>b</sup> School of Science, Beijing University of Civil Engineering and Architecture, Beijing

100044, China

\* Corresponding author, Jiemin Liu, *email: liujm@ustb.edu.cn*

Table S1 Determination conditions of TD-GCMS

| Instruments | Parameters                  | Values                                                                                                                               |
|-------------|-----------------------------|--------------------------------------------------------------------------------------------------------------------------------------|
| TD          | Tube desorption temperature | 280 °C                                                                                                                               |
|             | Tube desorption time        | 10 min                                                                                                                               |
|             | Cold trap temperature       | Low: 20 °C; high: 280 °C                                                                                                             |
|             | Cold trap desorption time   | 3 min                                                                                                                                |
|             | Cold trap sorbent           | Tenax TA                                                                                                                             |
|             | Transfer line temperature   | 200 °C                                                                                                                               |
|             | Split ratio                 | 30:1                                                                                                                                 |
| GC          | Injector temperature        | 280 °C                                                                                                                               |
|             | Column                      | DB-5MS, 60 m × 0.25 mm × 0.25 µm                                                                                                     |
|             | Carrier gas                 | He, constant flow, 1.2 mL·min <sup>-1</sup>                                                                                          |
|             | Temperature program         | The initial temperature was held at 50 °C for 2 min, then heated at the rate of 5 °C·min <sup>-1</sup> to 225 °C and held for 2 min. |
| MS          | Ion source                  | EI, 70 eV                                                                                                                            |
|             | Ion source temperature      | 230 °C                                                                                                                               |
|             | Quadrupole temperature      | 150 °C                                                                                                                               |
|             | Mass range                  | Scan mode, 40-350 m/z                                                                                                                |
|             | Transfer line temperature   | 280 °C                                                                                                                               |

**Table S2** The fitting results of  $a_1$  with relative humidity

| Compounds                | Exponential fitting   |                | Linear fitting     |                | Logarithmic fitting     |                | Polynomial fitting            |                | Power fitting        |                |
|--------------------------|-----------------------|----------------|--------------------|----------------|-------------------------|----------------|-------------------------------|----------------|----------------------|----------------|
|                          | Formula               | R <sup>2</sup> | Formula            | R <sup>2</sup> | Formula                 | R <sup>2</sup> | Formula                       | R <sup>2</sup> | Formula              | R <sup>2</sup> |
| n-Butyl acetate          | $y=2.1361e^{0.7473x}$ | 0.9905         | $y=2.2268x+2.0189$ | 0.9978         | $y=0.8879\ln(x)+3.8229$ | 0.9856         | $y=-0.7564x^2+2.9101x+1.893$  | 1              | $y=3.9228x^{0.3005}$ | 0.9951         |
| Ethylbenzene             | $y=0.1163e^{1.1341x}$ | 0.9796         | $y=0.218x+0.1002$  | 0.9959         | $y=0.0872\ln(x)+0.2771$ | 0.9895         | $y=-0.1006x^2+0.3089x+0.0835$ | 0.9997         | $y=0.2935x^{0.4596}$ | 0.9994         |
| PGMEA                    | $y=0.6876e^{1.0233x}$ | 0.9314         | $y=1.0998x+0.6169$ | 0.9401         | $y=0.4435\ln(x)+1.5126$ | 0.9499         | $y=-1.3048x^2+2.2786x+0.3997$ | 0.9643         | $y=1.5862x^{0.4152}$ | 0.9529         |
| p/m-Xylene               | $y=0.4873e^{1.7329x}$ | 0.8700         | $y=1.7428x+0.3389$ | 0.9447         | $y=0.7168\ln(x)+1.7718$ | 0.9927         | $y=-2.7938x^2+4.2667x-0.1261$ | 0.9891         | $y=2.0569x^{0.7285}$ | 0.9554         |
| o-Xylene                 | $y=1.1052e^{0.7513x}$ | 0.9732         | $y=1.154x+1.0467$  | 0.9879         | $y=0.4643\ln(x)+1.9856$ | 0.9935         | $y=-0.7562x^2+1.8372x+0.9208$ | 0.9957         | $y=2.0421x^{0.3052}$ | 0.9975         |
| Isopropyl benzene        | $y=0.0755e^{1.5537x}$ | 0.9712         | $y=0.2369x+0.0522$ | 0.9861         | $y=0.0936\ln(x)+0.2433$ | 0.9574         | $y=0.0527x^2+0.1893x+0.0609$  | 0.9870         | $y=0.2677x^{0.6276}$ | 0.9845         |
| 1, 2, 4-Trimethylbenzene | $y=0.0858e^{1.2591x}$ | 0.9658         | $y=0.1878x+0.0712$ | 0.9909         | $y=0.0755\ln(x)+0.2238$ | 0.9945         | $y=-0.1234x^2+0.2992x+0.0506$ | 0.9988         | $y=0.2407x^{0.5138}$ | 0.9991         |

**Table S3** The fitting results of  $a_1$  with the air change rate

| Compounds                | Exponential fitting   |                | Linear fitting      |                | Logarithmic fitting     |                | Polynomial fitting           |                | Power fitting        |                |
|--------------------------|-----------------------|----------------|---------------------|----------------|-------------------------|----------------|------------------------------|----------------|----------------------|----------------|
|                          | Formula               | R <sup>2</sup> | Formula             | R <sup>2</sup> | Formula                 | R <sup>2</sup> | Formula                      | R <sup>2</sup> | Formula              | R <sup>2</sup> |
| n-Butyl acetate          | $y=0.5833e^{-0.604x}$ | 0.7069         | $y=-0.1823x+0.5827$ | 0.5661         | $y=-0.297\ln(x)+0.3679$ | 0.7580         | $y=0.1728x^2-0.7902x+0.9547$ | 0.7987         | $y=0.2824x^{-0.931}$ | 0.8508         |
| PGMEA                    | $y=0.6651e^{-0.376x}$ | 0.6461         | $y=-0.1662x+0.6739$ | 0.5682         | $y=-0.269\ln(x)+0.4777$ | 0.7519         | $y=0.1471x^2-0.6834x+0.9904$ | 0.7718         | $y=0.4241x^{-0.589}$ | 0.7991         |
| p/m-Xylene               | $y=0.2923e^{-0.576x}$ | 0.7223         | $y=-0.0855x+0.2837$ | 0.5848         | $y=-0.137\ln(x)+0.1824$ | 0.7640         | $y=0.0721x^2-0.3392x+0.4389$ | 0.7749         | $y=0.1456x^{-0.872}$ | 0.8367         |
| o-Xylene                 | $y=0.5942e^{-0.554x}$ | 0.7568         | $y=-0.1671x+0.5678$ | 0.6119         | $y=-0.267\ln(x)+0.3695$ | 0.7888         | $y=0.1358x^2-0.6447x+0.8601$ | 0.7967         | $y=0.3037x^{-0.834}$ | 0.8680         |
| 1, 2, 4-Trimethylbenzene | $y=0.0501e^{-0.506x}$ | 0.6651         | $y=-0.0142x+0.0498$ | 0.5646         | $y=-0.023\ln(x)+0.033$  | 0.7378         | $y=0.0115x^2-0.0548x+0.0746$ | 0.7357         | $y=0.0272x^{-0.77}$  | 0.7796         |

**Table S4** The fitting results of  $b_1$  with relative humidity

| Compounds                | Exponential fitting   |                | Linear fitting     |                | Logarithmic fitting     |                | Polynomial fitting            |                | Power fitting        |                |
|--------------------------|-----------------------|----------------|--------------------|----------------|-------------------------|----------------|-------------------------------|----------------|----------------------|----------------|
|                          | Formula               | R <sup>2</sup> | Formula            | R <sup>2</sup> | Formula                 | R <sup>2</sup> | Formula                       | R <sup>2</sup> | Formula              | R <sup>2</sup> |
| n-Butyl acetate          | $y=0.0118e^{0.6913x}$ | 0.8857         | $y=0.0113x+0.0112$ | 0.8820         | $y=0.0044\ln(x)+0.0202$ | 0.8312         | $y=0.0138x^2-0.0012x+0.0135$  | 0.9062         | $y=0.0205x^{0.2724}$ | 0.8544         |
| Ethylbenzene             | $y=0.0147e^{1.1269x}$ | 0.8856         | $y=0.0274x+0.0127$ | 0.9091         | $y=0.0109\ln(x)+0.0348$ | 0.8952         | $y=0.0062x^2+0.0217x+0.0137$  | 0.9100         | $y=0.0369x^{0.4576}$ | 0.9072         |
| PGMEA                    | $y=0.0038e^{1.3007x}$ | 0.9340         | $y=0.0089x+0.0031$ | 0.9647         | $y=0.0036\ln(x)+0.0103$ | 0.9588         | $y=-0.0016x^2+0.0104x+0.0029$ | 0.9653         | $y=0.0111x^{0.5307}$ | 0.9661         |
| p/m-Xylene               | $y=0.0085e^{0.9625x}$ | 0.7590         | $y=0.0135x+0.0074$ | 0.7772         | $y=0.0048\ln(x)+0.0178$ | 0.6271         | $y=0.0498x^2-0.0315x+0.0157$  | 0.9716         | $y=0.018x^{0.3465}$  | 0.6112         |
| o-Xylene                 | $y=0.0086e^{0.8186x}$ | 0.6108         | $y=0.0102x+0.0081$ | 0.6267         | $y=0.004\ln(x)+0.0163$  | 0.6142         | $y=0.0107x^2+0.0005x+0.0099$  | 0.6394         | $y=0.0167x^{0.331}$  | 0.6205         |
| Isopropyl benzene        | $y=0.0129e^{1.0012x}$ | 0.4683         | $y=0.0199x+0.012$  | 0.4782         | $y=0.008\ln(x)+0.0282$  | 0.4760         | $y=0.0228x^2-0.0006x+0.0158$  | 0.4896         | $y=0.0293x^{0.4099}$ | 0.4877         |
| 1, 2, 4-Trimethylbenzene | $y=0.0087e^{1.4167x}$ | 0.7973         | $y=0.0234x+0.0066$ | 0.8225         | $y=0.0092\ln(x)+0.0255$ | 0.7955         | $y=0.0199x^2+0.0054x+0.0099$  | 0.8335         | $y=0.0276x^{0.5745}$ | 0.8147         |

**Table S5** The fitting results of  $b_1$  with the air change rate

| Compounds                | Exponential fitting   |                | Linear fitting     |                | Logarithmic fitting     |                | Polynomial fitting           |                | Power fitting        |                |
|--------------------------|-----------------------|----------------|--------------------|----------------|-------------------------|----------------|------------------------------|----------------|----------------------|----------------|
|                          | Formula               | R <sup>2</sup> | Formula            | R <sup>2</sup> | Formula                 | R <sup>2</sup> | Formula                      | R <sup>2</sup> | Formula              | R <sup>2</sup> |
| n-Butyl acetate          | $y=0.0059e^{0.16x}$   | 0.4113         | $y=0.0013x+0.0058$ | 0.4862         | $y=0.0014\ln(x)+0.0075$ | 0.2919         | $y=0.0012x^2-0.0028x+0.0083$ | 0.6780         | $y=0.0073x^{0.1702}$ | 0.2356         |
| PGMEA                    | $y=0.0033e^{0.1873x}$ | 0.5342         | $y=0.0009x+0.0032$ | 0.6211         | $y=0.001\ln(x)+0.0044$  | 0.4216         | $y=0.0006x^2-0.0013x+0.0046$ | 0.7570         | $y=0.0043x^{0.2128}$ | 0.3489         |
| p/m-Xylene               | $y=0.0044e^{0.1161x}$ | 0.4023         | $y=0.0006x+0.0044$ | 0.4429         | $y=0.0007\ln(x)+0.0052$ | 0.3354         | $y=0.0001x^2+0.0003x+0.0046$ | 0.4479         | $y=0.0051x^{0.1387}$ | 0.2906         |
| o-Xylene                 | $y=0.0042e^{0.1413x}$ | 0.4015         | $y=0.0007x+0.0042$ | 0.4590         | $y=0.0009\ln(x)+0.0051$ | 0.3315         | $y=0.0002x^2-8E-05x+0.0047$  | 0.4799         | $y=0.005x^{0.1644}$  | 0.2749         |
| 1, 2, 4-Trimethylbenzene | $y=0.0045e^{0.1877x}$ | 0.4484         | $y=0.0011x+0.0044$ | 0.5385         | $y=0.0013\ln(x)+0.0059$ | 0.3743         | $y=0.0006x^2-0.0009x+0.0057$ | 0.6049         | $y=0.0057x^{0.214}$  | 0.2952         |

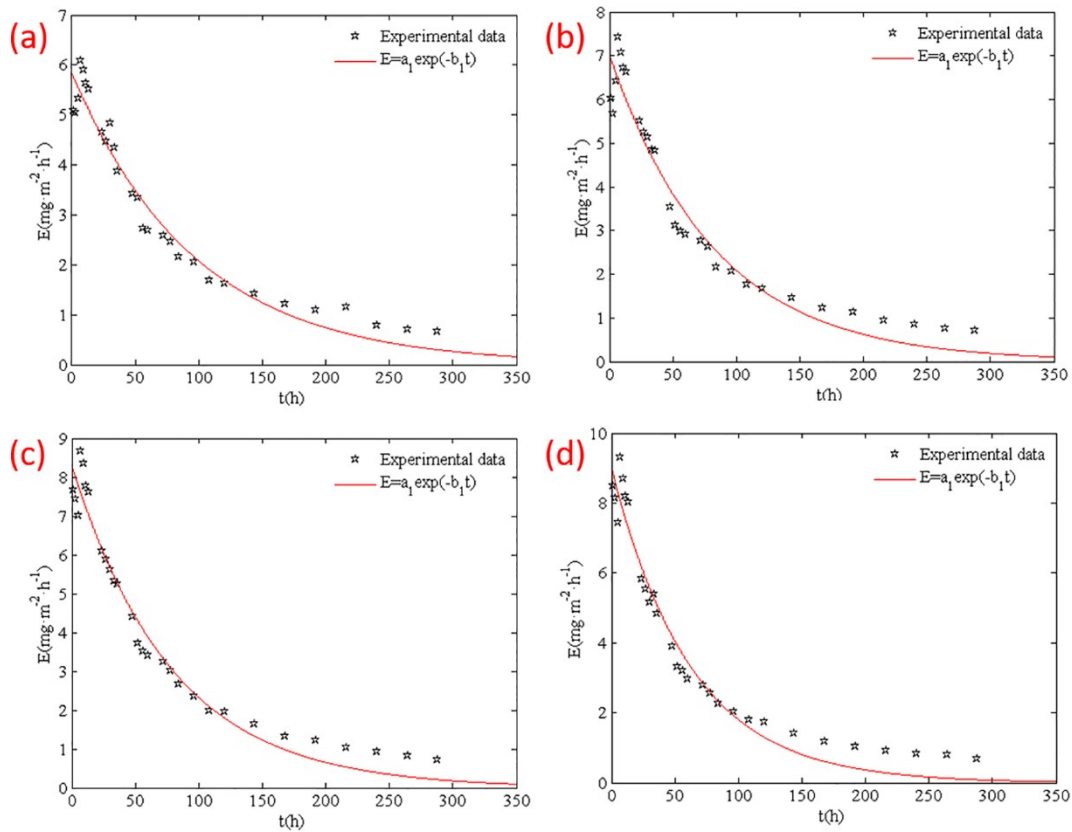

**Fig. S1** Fitting of TVOC emission rates with single exponential model at ACR 1.0 h<sup>-1</sup> and different relative humidity: (a) 20%; (b) 30%; (c) 50%; (d) 70%.

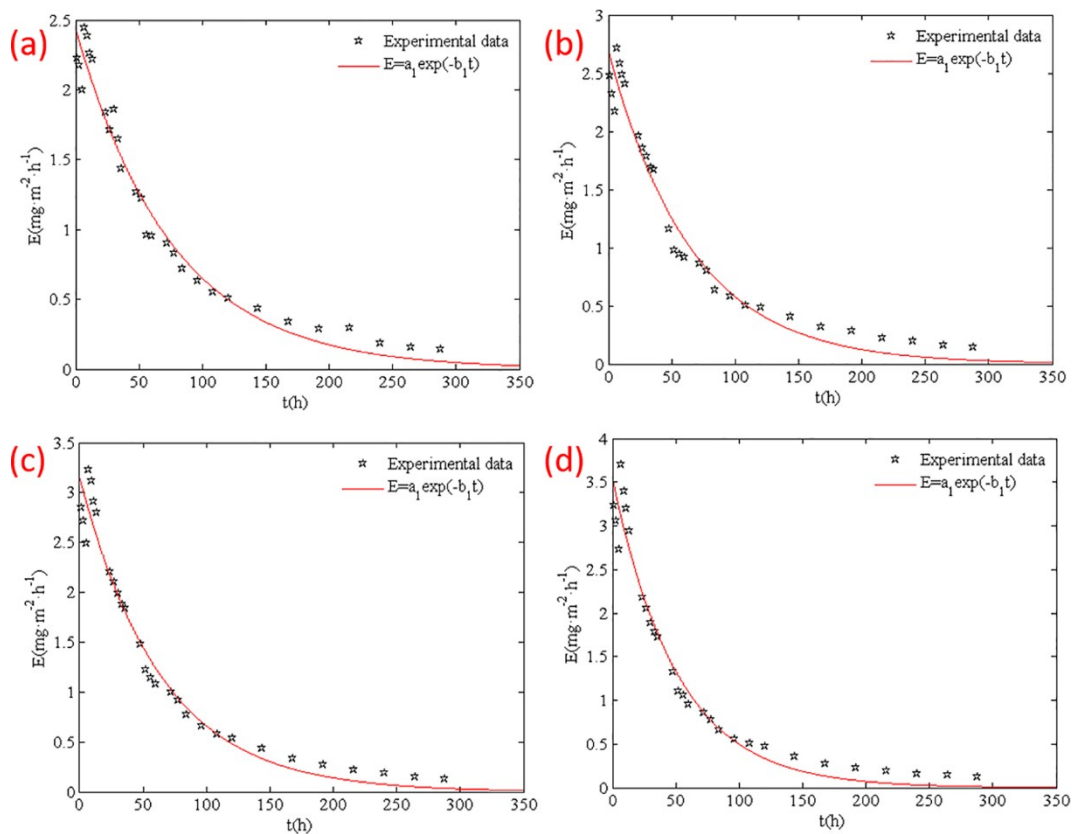

**Fig. S2** Fitting of acetic acid butyl ester emission rates with single exponential model at ACR

$1.0 \text{ h}^{-1}$  and different relative humidity: (a) 20%; (b) 30%; (c) 50%; (d) 70%.

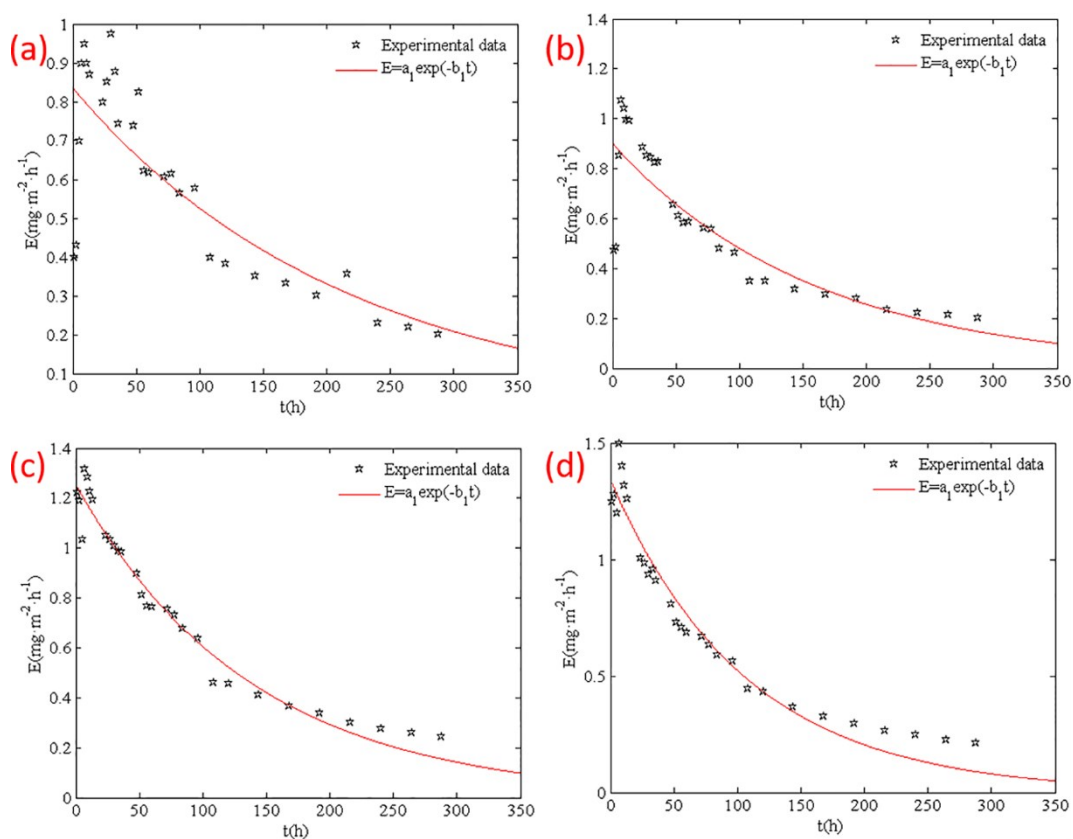

**Fig. S3** Fitting of a PGMEA emission rates with single exponential model at ACR  $1.0 \text{ h}^{-1}$  and

different relative humidity: (a) 20%; (b) 30%; (c) 50%; (d) 70%.

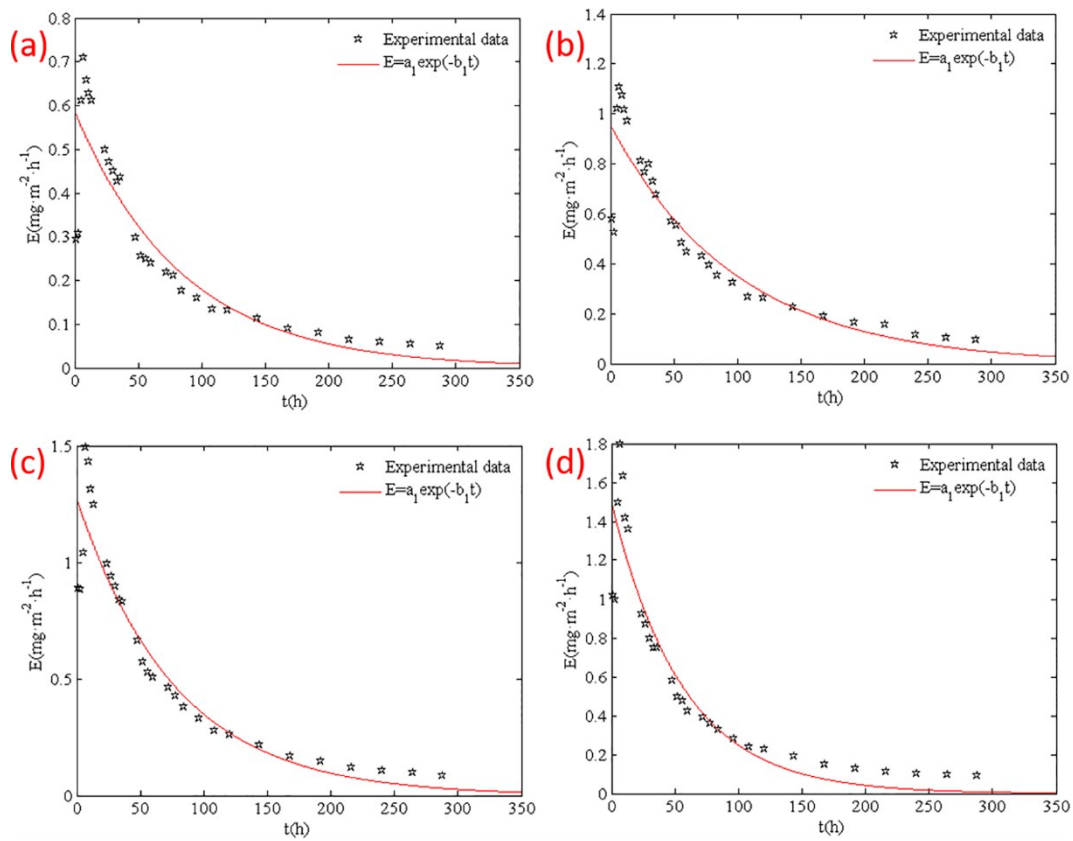

**Fig. S4** Fitting of m/p-Xylene emission rates with single exponential model at ACR  $1.0 \text{ h}^{-1}$  and different relative humidity: (a) 20%; (b) 30%; (c) 50%; (d) 70%.

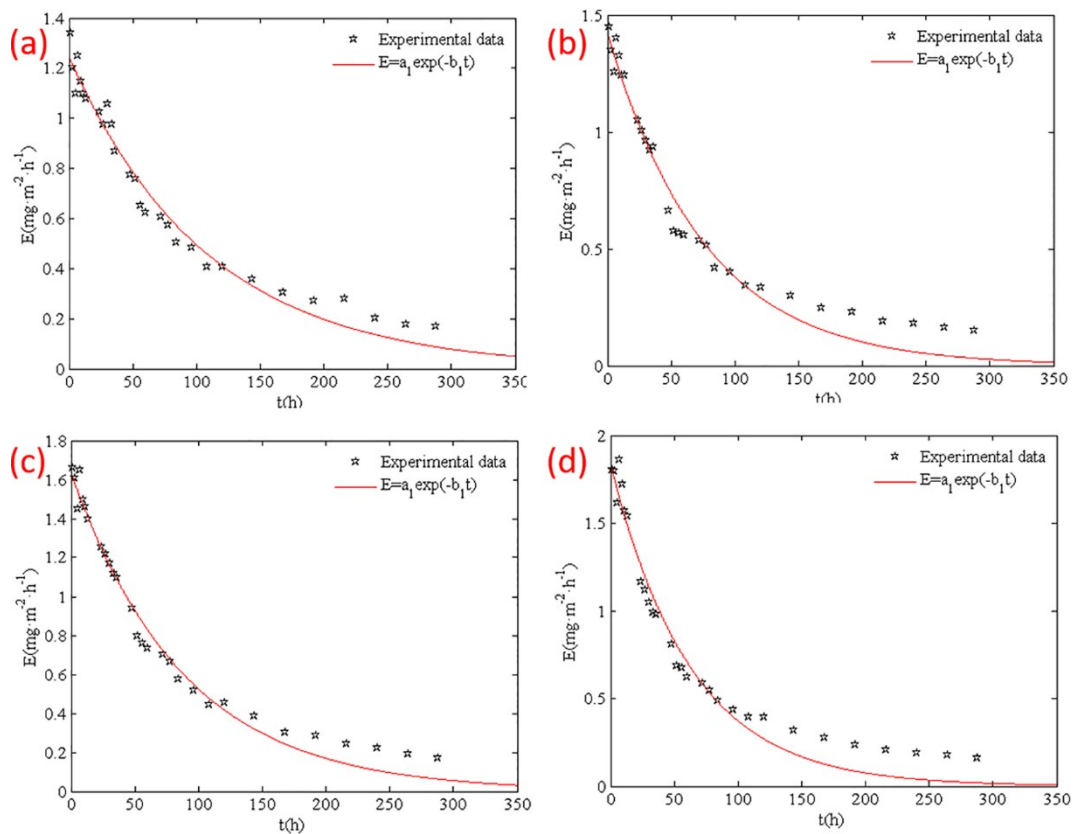

**Fig. S5** Fitting of o-Xylene emission rates with single exponential model at ACR 1.0 h<sup>-1</sup> and different relative humidity: (a) 20%; (b) 30%; (c) 50%; (d) 70%.

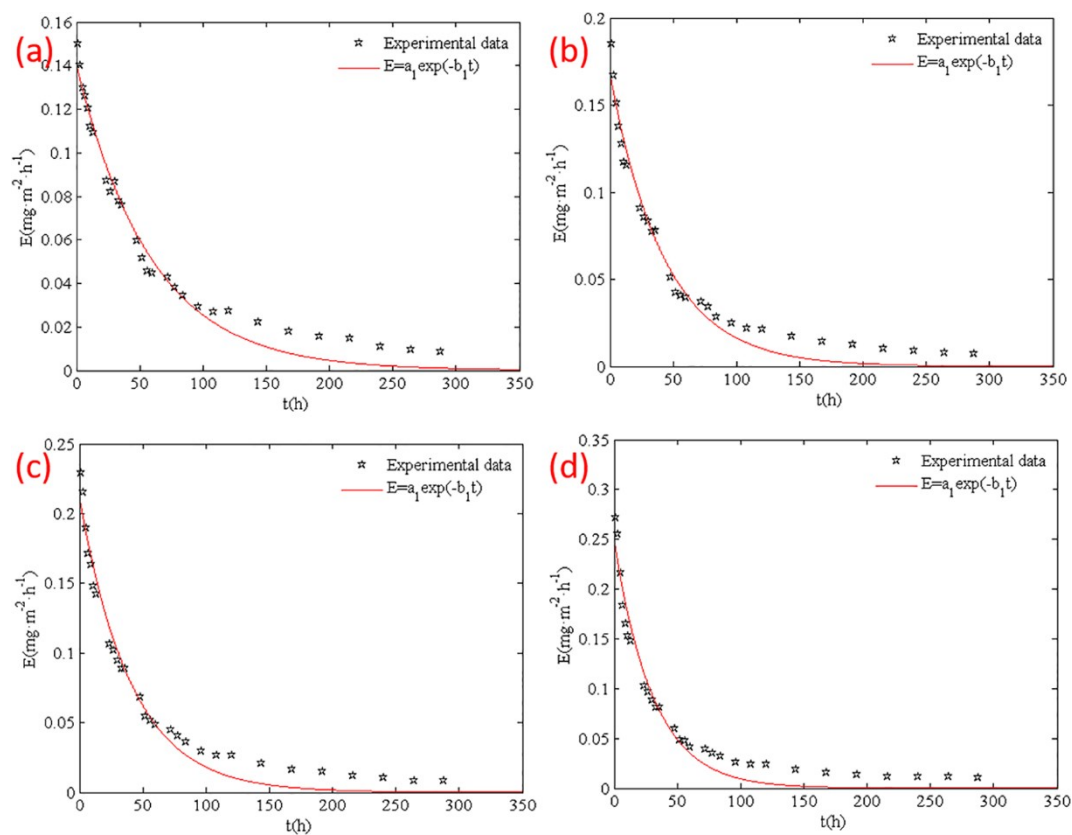

**Fig. S6** Fitting of Ethylbenzene emission rates with single exponential model at ACR 1.0 h<sup>-1</sup> and different relative humidity: (a) 20%; (b) 30%; (c) 50%; (d) 70%.



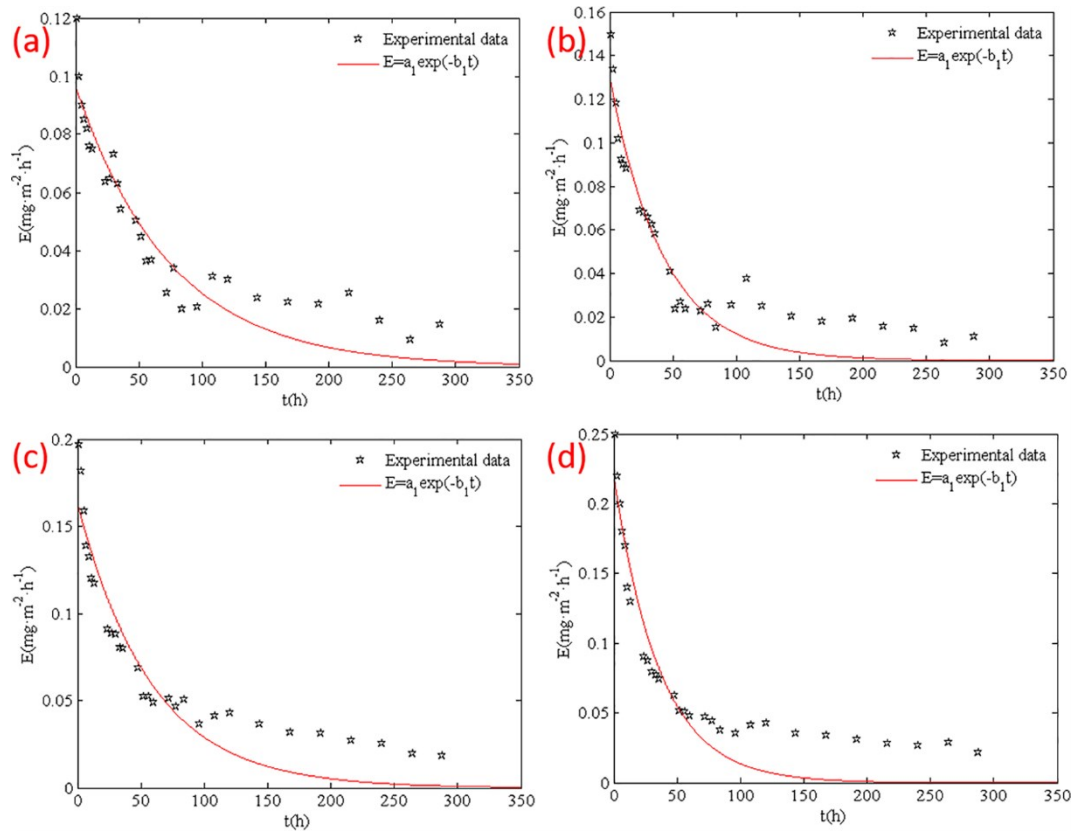

**Fig. S7** Fitting of Isopropyl benzene emission rates with single exponential model at ACR 1.0

$\text{h}^{-1}$  and different relative humidity: (a) 20%; (b) 30%; (c) 50%; (d) 70%.

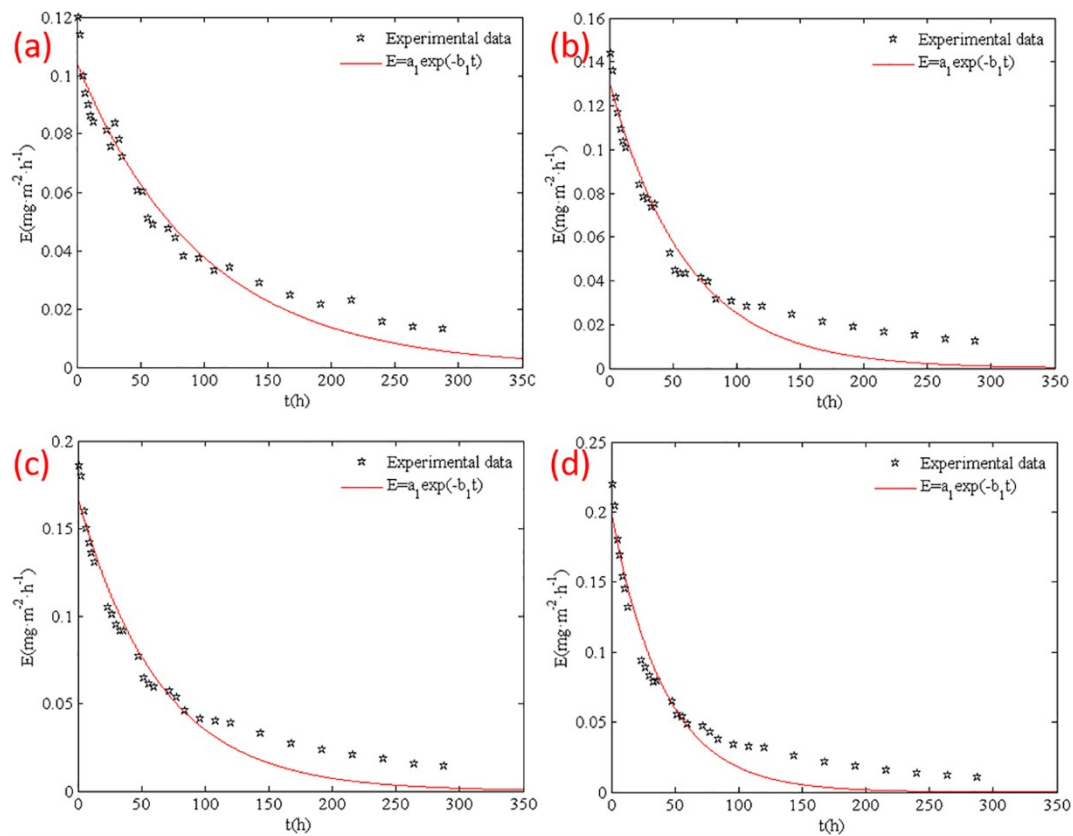

**Fig. S8** Fitting of 1,2,4-Trimethylbenzene emission rates with single exponential model at ACR

$1.0 \text{ h}^{-1}$  and different relative humidity: (a) 20%; (b) 30%; (c) 50%; (d) 70%.

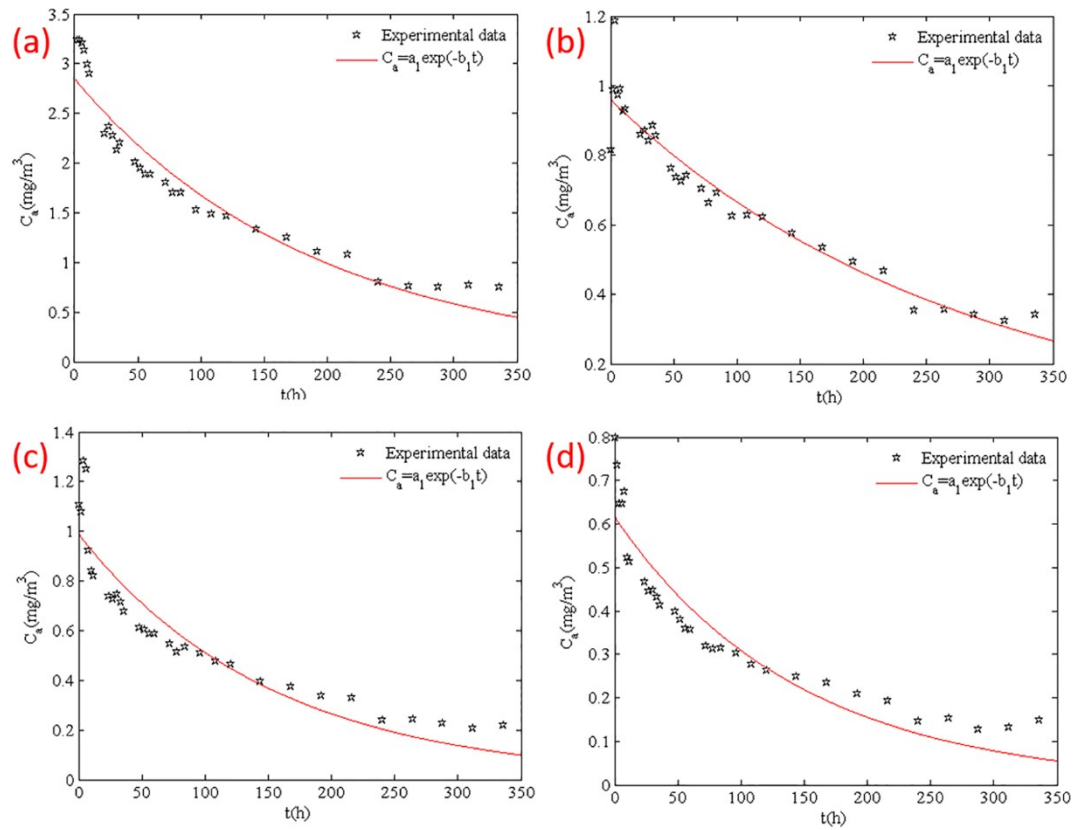

**Fig. S9** Fitting of TVOC concentrations with single exponential model at RH 50% and different

ACR: (a)  $0.5 \text{ h}^{-1}$ ; (b)  $1.0 \text{ h}^{-1}$ ; (c)  $2.0 \text{ h}^{-1}$ ; (d)  $3.0 \text{ h}^{-1}$ .

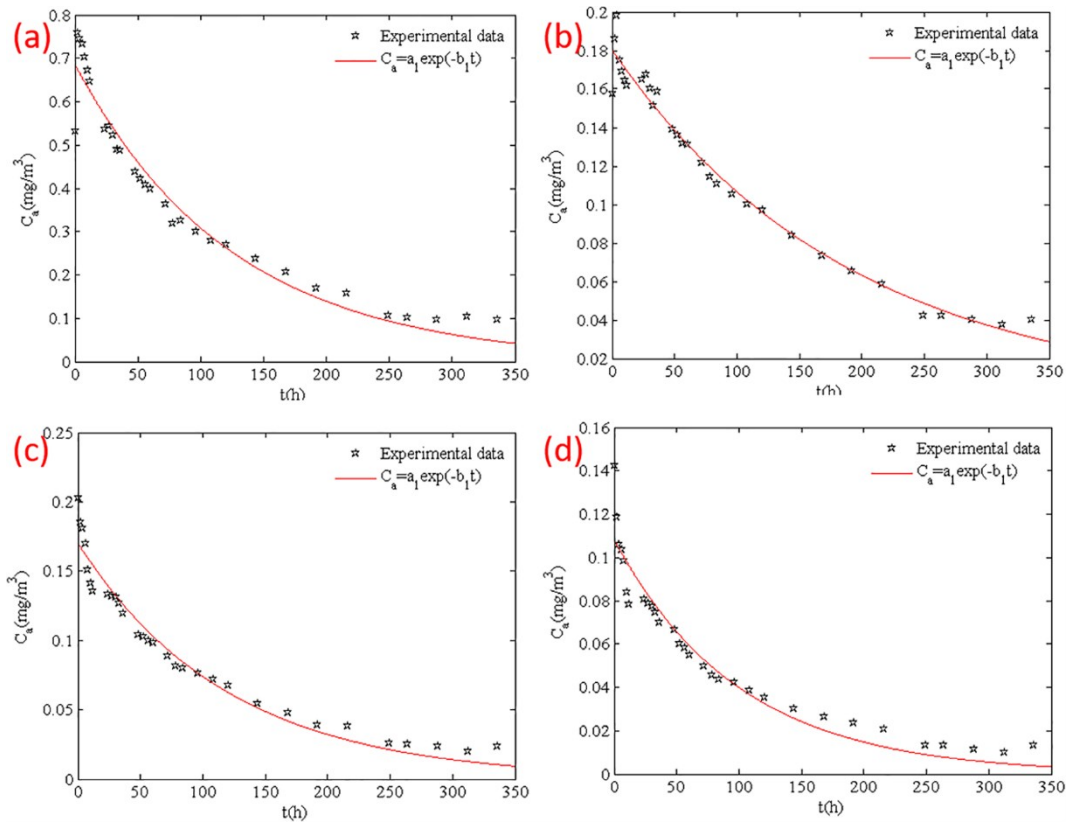

**Fig. S10** Fitting of Acetic acid butyl ester concentrations with single exponential model at RH 50% and different ACR: (a)  $0.5 \text{ h}^{-1}$ ; (b)  $1.0 \text{ h}^{-1}$ ; (c)  $2.0 \text{ h}^{-1}$ ; (d)  $3.0 \text{ h}^{-1}$ .

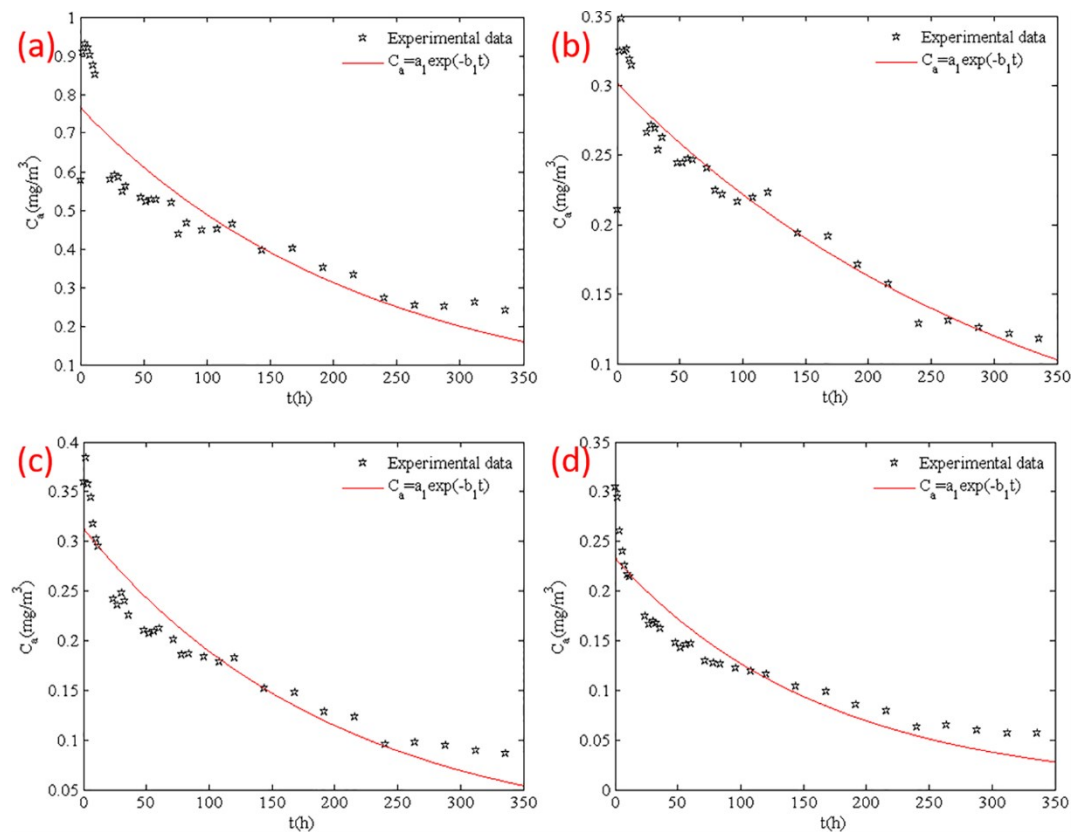

**Fig. S11** Fitting of PGMEA concentrations with single exponential model at RH 50% and different ACR: (a)  $0.5 \text{ h}^{-1}$ ; (b)  $1.0 \text{ h}^{-1}$ ; (c)  $2.0 \text{ h}^{-1}$ ; (d)  $3.0 \text{ h}^{-1}$ .

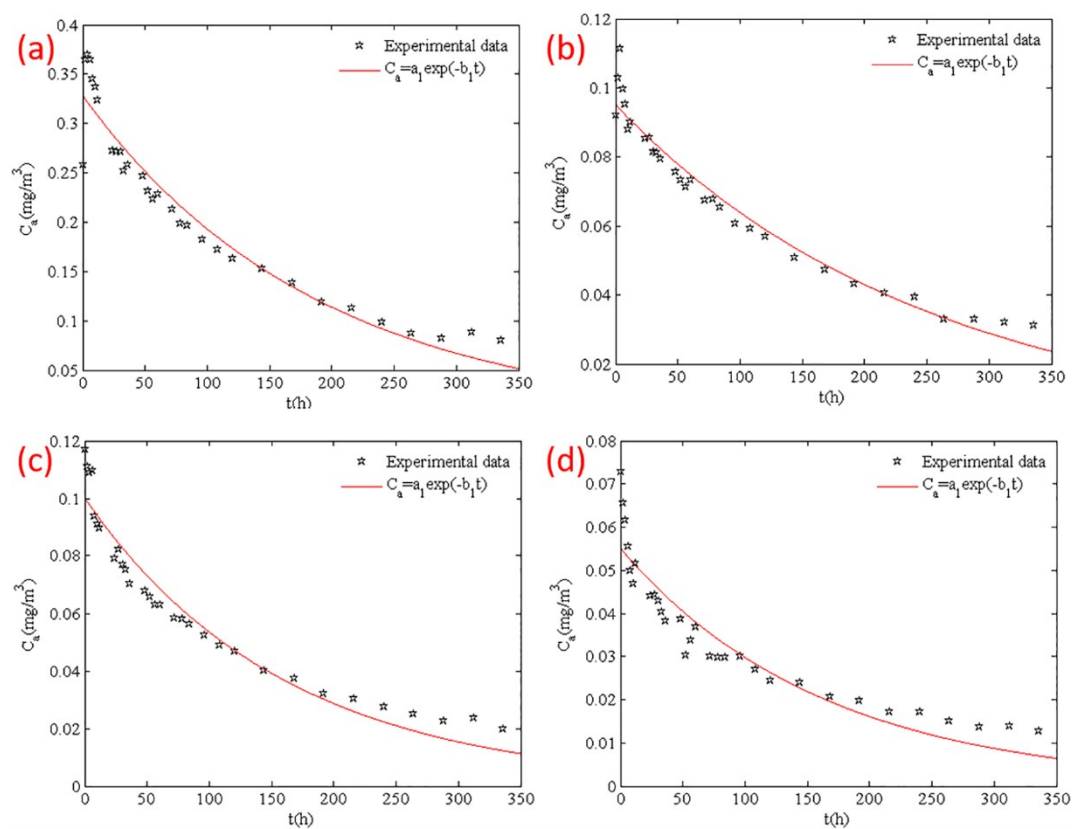

**Fig. S12** Fitting of p/m-Xylene concentrations with single exponential model at RH 50% and different ACR: (a)  $0.5 \text{ h}^{-1}$ ; (b)  $1.0 \text{ h}^{-1}$ ; (c)  $2.0 \text{ h}^{-1}$ ; (d)  $3.0 \text{ h}^{-1}$ .

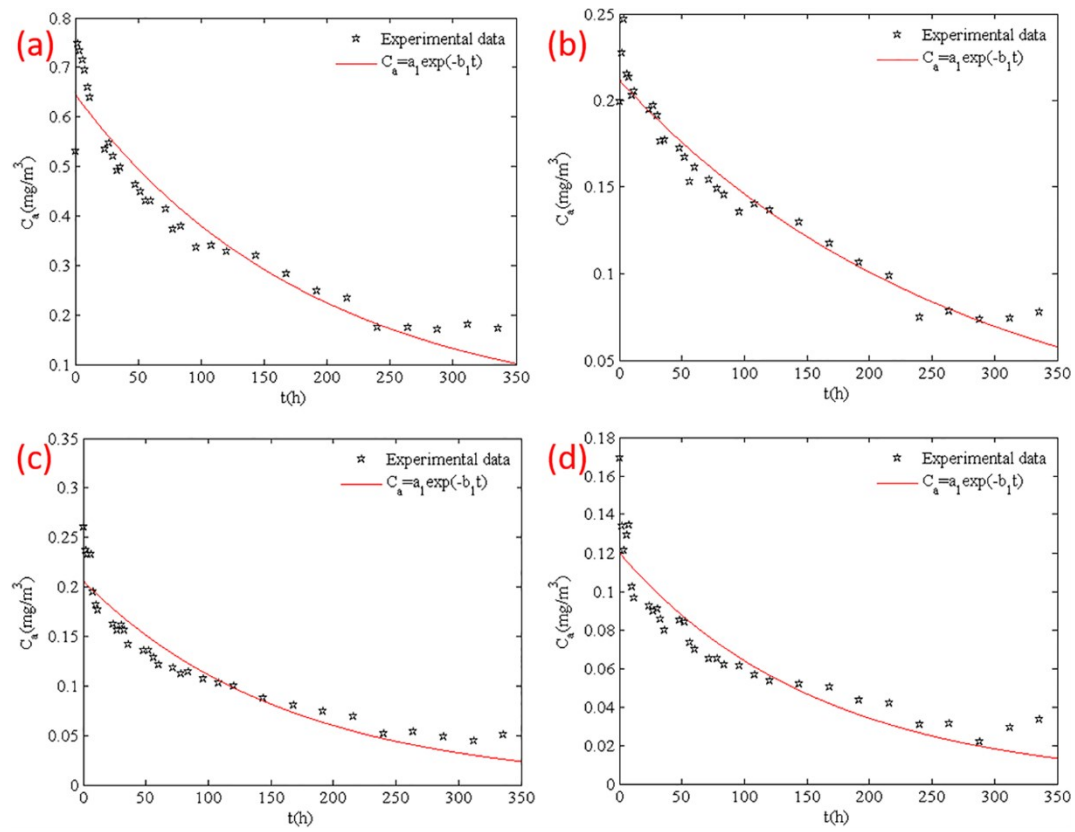

**Fig. S13** Fitting of o-Xylene concentrations with single exponential model at RH 50% and different ACR: (a)  $0.5 \text{ h}^{-1}$ ; (b)  $1.0 \text{ h}^{-1}$ ; (c)  $2.0 \text{ h}^{-1}$ ; (d)  $3.0 \text{ h}^{-1}$ .
